# Supplementary material
Source: ML conference proceedings conference paper supplement (https://proceedings.neurips.cc/paper_files/paper/2022/hash/2de60892dd329683ec21877a4e7c3091-Abstract.html)
Supplement: Supplementary file 1 [file 2de60892dd329683ec21877a4e7c3091-Supplemental-Datasets_and_Benchmarks.zip]

Archive with 1 entries (1 files):
- m4singer_supp.pdf
